# Supplementary material for: Mre11 modulates the fidelity of fusion between short telomeres in human cells
Source: PubMed Central journal article supplement — Nucleic Acids Res. 2011 Dec 1;40(6):2518–26. doi: 10.1093/nar/gkr1117 (PMC3315324; doi:10.1093/nar/gkr1117), 2011-12-01
Supplement: supp_gkr1117_nar-01718-m-2011-File005.pdf [file supp_gkr1117_nar-01718-m-2011-File005.pdf]

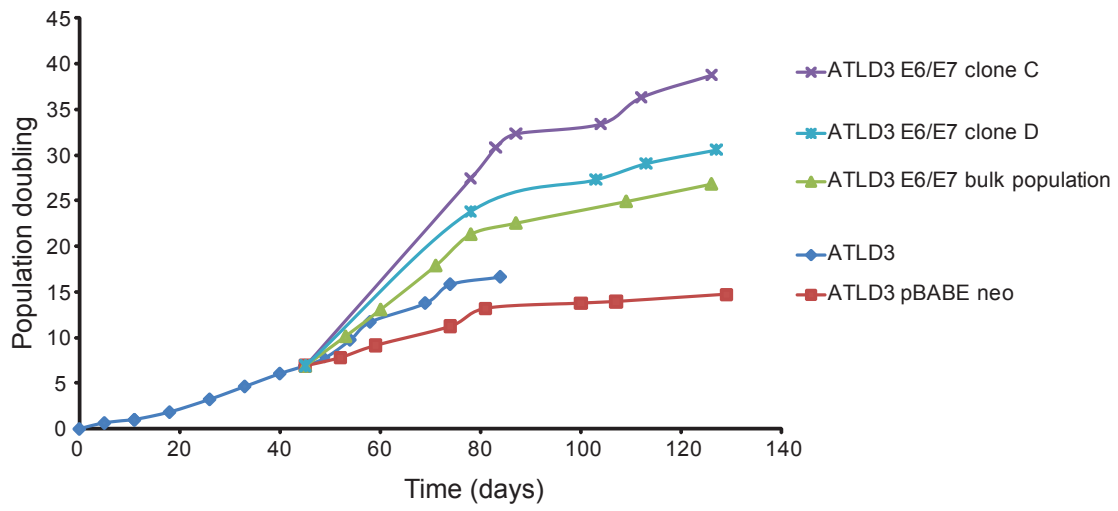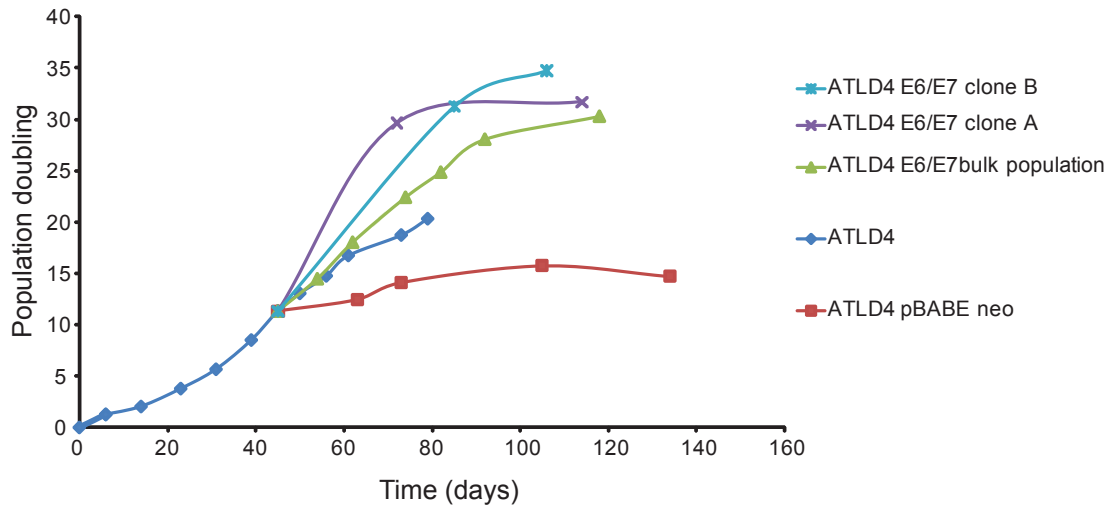

**Supplementary figure 1.** Cell growth of ATLD 3 and 4 cell as indicated on each plot. Population doublings are plotted as a function of time in days.

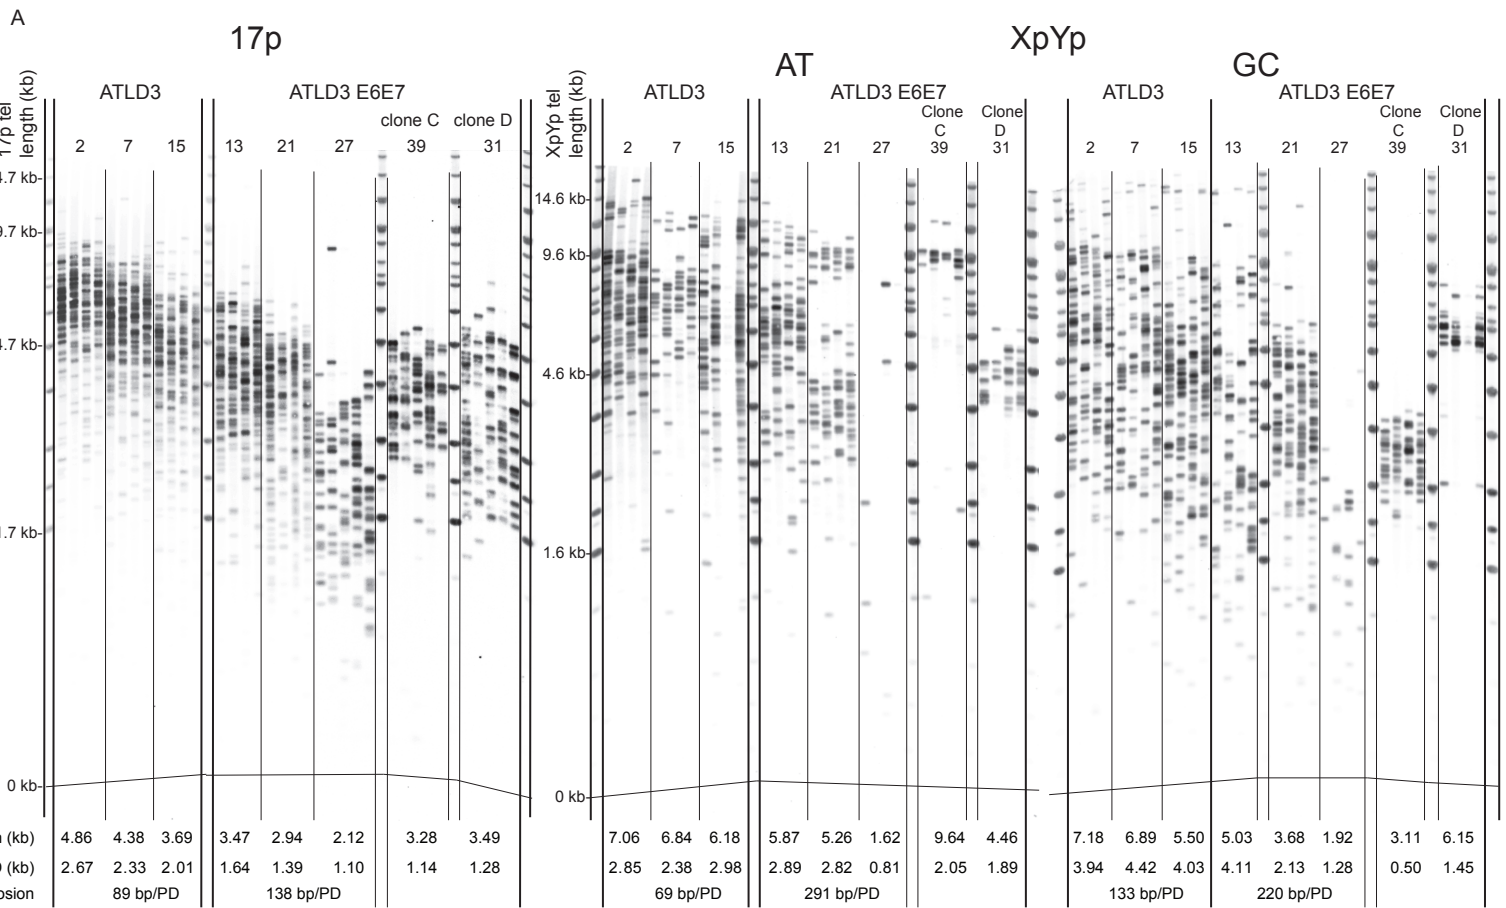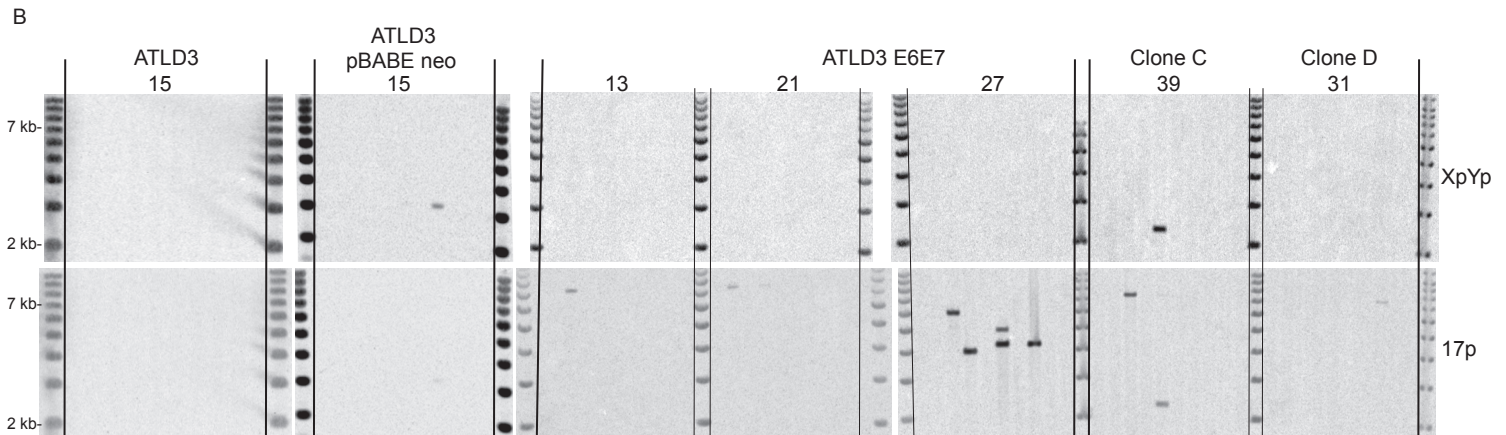

**Supplementary figure 2.** Telomere dynamics and fusion in ATLD3 cells. A. 17p STELA and XpYp allele specific STELA (GC and AT alleles); the population doubling (PD) point of the culture is indicated above each gel. Mean telomere length, standard deviation and rate of telomere erosion as a function of PD is indicated below the gel. B. Telomere fusion analysis, single molecule fusion events are detected by southern hybridisation with the XpYp and 17p telomere-adjacent probes as indicated on the right. The PD points of the cultures are indicated above.
